# Supplementary material for: 0s and 1s in marine molecular research: a regional HPC perspective
Source: Gigascience. 2021 Aug 18;10(8):giab053. doi: 10.1093/gigascience/giab053 (PMC8371273; doi:10.1093/gigascience/giab053)

|                                                      |                                                                                                                                                                                                                                                                                                                                                                                                                                                                                                                                                                                                                                                                                                                                                                                                                                                                                                                                                                                                                                                                                                                                                                                                                                                                                                                                                                                                                                                                                                                                                                                                                            |                         |
|------------------------------------------------------|----------------------------------------------------------------------------------------------------------------------------------------------------------------------------------------------------------------------------------------------------------------------------------------------------------------------------------------------------------------------------------------------------------------------------------------------------------------------------------------------------------------------------------------------------------------------------------------------------------------------------------------------------------------------------------------------------------------------------------------------------------------------------------------------------------------------------------------------------------------------------------------------------------------------------------------------------------------------------------------------------------------------------------------------------------------------------------------------------------------------------------------------------------------------------------------------------------------------------------------------------------------------------------------------------------------------------------------------------------------------------------------------------------------------------------------------------------------------------------------------------------------------------------------------------------------------------------------------------------------------------|-------------------------|
| <b>Manuscript Number:</b>                            | GIGA-D-21-00111                                                                                                                                                                                                                                                                                                                                                                                                                                                                                                                                                                                                                                                                                                                                                                                                                                                                                                                                                                                                                                                                                                                                                                                                                                                                                                                                                                                                                                                                                                                                                                                                            |                         |
| <b>Full Title:</b>                                   | 0s and 1s in marine molecular research: a regional HPC perspective                                                                                                                                                                                                                                                                                                                                                                                                                                                                                                                                                                                                                                                                                                                                                                                                                                                                                                                                                                                                                                                                                                                                                                                                                                                                                                                                                                                                                                                                                                                                                         |                         |
| <b>Article Type:</b>                                 | Review                                                                                                                                                                                                                                                                                                                                                                                                                                                                                                                                                                                                                                                                                                                                                                                                                                                                                                                                                                                                                                                                                                                                                                                                                                                                                                                                                                                                                                                                                                                                                                                                                     |                         |
| <b>Funding Information:</b>                          | FP7 Research Potential of Convergence Regions (FP7-REGPOT-2010-1)                                                                                                                                                                                                                                                                                                                                                                                                                                                                                                                                                                                                                                                                                                                                                                                                                                                                                                                                                                                                                                                                                                                                                                                                                                                                                                                                                                                                                                                                                                                                                          | Dr Antonios Magoulas    |
|                                                      | General Secretariat for Research and Technology (GR) (MIS 384676)                                                                                                                                                                                                                                                                                                                                                                                                                                                                                                                                                                                                                                                                                                                                                                                                                                                                                                                                                                                                                                                                                                                                                                                                                                                                                                                                                                                                                                                                                                                                                          | Dr Christos Arvanitidis |
|                                                      | European Regional Development Fund () (MIS 5002670)                                                                                                                                                                                                                                                                                                                                                                                                                                                                                                                                                                                                                                                                                                                                                                                                                                                                                                                                                                                                                                                                                                                                                                                                                                                                                                                                                                                                                                                                                                                                                                        | Dr Antonios Magoulas    |
| <b>Abstract:</b>                                     | <p>High-performance computing (HPC) systems have become indispensable for modern marine research, providing support to an increasing number and diversity of users. Pairing with the impetus offered by high-throughput methods to key areas such as non-model organism studies, their operation continuously evolves to meet the corresponding computational challenges.</p> <p>Here we present a Tier-2 (regional) HPC facility, operating for over a decade at the Institute of Marine Biology, Biotechnology, and Aquaculture (IMBBC) of the Hellenic Centre for Marine Research in Greece. Strategic choices made in design and upgrades aimed to strike a balance between depth (the need for a few high-memory nodes) and breadth (a number of slimmer nodes), as dictated by the idiosyncrasy of the supported research. An in-depth computational requirement analysis of the latter revealed the diversity of marine fields, methods and approaches adopted to translate data into knowledge. In addition, hardware and software architectures, usage statistics, policy and user management aspects are presented.</p> <p>Drawing upon the last decade's experience from the different levels of operation of the IMBBC HPC facility, a number of lessons are presented; these have contributed to the facility's future directions, in the light of emerging distribution technologies (e.g. containers) and Research Infrastructure evolution. In combination with detailed knowledge of the facility usage and its upcoming upgrade, future collaborations in marine research and beyond are envisioned.</p> |                         |
| <b>Corresponding Author:</b>                         | Evangelos Pafilis<br>Hellenic Center for Marine Research<br>Heraklion Crete, GREECE                                                                                                                                                                                                                                                                                                                                                                                                                                                                                                                                                                                                                                                                                                                                                                                                                                                                                                                                                                                                                                                                                                                                                                                                                                                                                                                                                                                                                                                                                                                                        |                         |
| <b>Corresponding Author Secondary Information:</b>   |                                                                                                                                                                                                                                                                                                                                                                                                                                                                                                                                                                                                                                                                                                                                                                                                                                                                                                                                                                                                                                                                                                                                                                                                                                                                                                                                                                                                                                                                                                                                                                                                                            |                         |
| <b>Corresponding Author's Institution:</b>           | Hellenic Center for Marine Research                                                                                                                                                                                                                                                                                                                                                                                                                                                                                                                                                                                                                                                                                                                                                                                                                                                                                                                                                                                                                                                                                                                                                                                                                                                                                                                                                                                                                                                                                                                                                                                        |                         |
| <b>Corresponding Author's Secondary Institution:</b> |                                                                                                                                                                                                                                                                                                                                                                                                                                                                                                                                                                                                                                                                                                                                                                                                                                                                                                                                                                                                                                                                                                                                                                                                                                                                                                                                                                                                                                                                                                                                                                                                                            |                         |
| <b>First Author:</b>                                 | Haris Zafeiropoulos                                                                                                                                                                                                                                                                                                                                                                                                                                                                                                                                                                                                                                                                                                                                                                                                                                                                                                                                                                                                                                                                                                                                                                                                                                                                                                                                                                                                                                                                                                                                                                                                        |                         |
| <b>First Author Secondary Information:</b>           |                                                                                                                                                                                                                                                                                                                                                                                                                                                                                                                                                                                                                                                                                                                                                                                                                                                                                                                                                                                                                                                                                                                                                                                                                                                                                                                                                                                                                                                                                                                                                                                                                            |                         |
| <b>Order of Authors:</b>                             | Haris Zafeiropoulos<br>Anastasia Gioti<br>Stelios Ninidakis<br>Antonios Potirakis<br>Savvas Paragkamian<br>Nelina Angelova<br>Aglaia Antoniou                                                                                                                                                                                                                                                                                                                                                                                                                                                                                                                                                                                                                                                                                                                                                                                                                                                                                                                                                                                                                                                                                                                                                                                                                                                                                                                                                                                                                                                                              |                         |

|                                                                                                                                                                                                                                                                                                  |                          |
|--------------------------------------------------------------------------------------------------------------------------------------------------------------------------------------------------------------------------------------------------------------------------------------------------|--------------------------|
|                                                                                                                                                                                                                                                                                                  | Theodoros Danis          |
|                                                                                                                                                                                                                                                                                                  | Elisavet Kaitetzidou     |
|                                                                                                                                                                                                                                                                                                  | Panagiotis Kasapidis     |
|                                                                                                                                                                                                                                                                                                  | Jon Bent Kristoffersen   |
|                                                                                                                                                                                                                                                                                                  | Vasileios Papadogiannis  |
|                                                                                                                                                                                                                                                                                                  | Christina Pavloudi       |
|                                                                                                                                                                                                                                                                                                  | Quốc Việt Hà             |
|                                                                                                                                                                                                                                                                                                  | Jacques Lagnel           |
|                                                                                                                                                                                                                                                                                                  | Nikos Pattakos           |
|                                                                                                                                                                                                                                                                                                  | Giorgos Perantinos       |
|                                                                                                                                                                                                                                                                                                  | Dimitris Sidirokastritis |
|                                                                                                                                                                                                                                                                                                  | Panagiotis Vavilis       |
|                                                                                                                                                                                                                                                                                                  | Georgios Kotoulas        |
|                                                                                                                                                                                                                                                                                                  | Tereza Manousaki         |
|                                                                                                                                                                                                                                                                                                  | Elena Sarropoulou        |
|                                                                                                                                                                                                                                                                                                  | Costas Tsigenopoulos     |
|                                                                                                                                                                                                                                                                                                  | Christos Arvanitidis     |
|                                                                                                                                                                                                                                                                                                  | Antonios Magoulas        |
|                                                                                                                                                                                                                                                                                                  | Evangelos Pafilis        |
| <b>Order of Authors Secondary Information:</b>                                                                                                                                                                                                                                                   |                          |
| <b>Additional Information:</b>                                                                                                                                                                                                                                                                   |                          |
| <b>Question</b>                                                                                                                                                                                                                                                                                  | <b>Response</b>          |
| Are you submitting this manuscript to a special series or article collection?                                                                                                                                                                                                                    | No                       |
| <b>Experimental design and statistics</b>                                                                                                                                                                                                                                                        | Yes                      |
| Full details of the experimental design and statistical methods used should be given in the Methods section, as detailed in our <a href="#">Minimum Standards Reporting Checklist</a> . Information essential to interpreting the data presented should be made available in the figure legends. |                          |
| Have you included all the information requested in your manuscript?                                                                                                                                                                                                                              |                          |
| <b>Resources</b>                                                                                                                                                                                                                                                                                 | Yes                      |
| A description of all resources used, including antibodies, cell lines, animals                                                                                                                                                                                                                   |                          |

|                                                                                                                                                                                                                                                                                                                                                                                                                                                                                                                                                         |            |
|---------------------------------------------------------------------------------------------------------------------------------------------------------------------------------------------------------------------------------------------------------------------------------------------------------------------------------------------------------------------------------------------------------------------------------------------------------------------------------------------------------------------------------------------------------|------------|
| <p>and software tools, with enough information to allow them to be uniquely identified, should be included in the Methods section. Authors are strongly encouraged to cite <a href="#">Research Resource Identifiers</a> (RRIDs) for antibodies, model organisms and tools, where possible.</p> <p>Have you included the information requested as detailed in our <a href="#">Minimum Standards Reporting Checklist</a>?</p>                                                                                                                            |            |
| <p><b>Availability of data and materials</b></p> <p>All datasets and code on which the conclusions of the paper rely must be either included in your submission or deposited in <a href="#">publicly available repositories</a> (where available and ethically appropriate), referencing such data using a unique identifier in the references and in the “Availability of Data and Materials” section of your manuscript.</p> <p>Have you have met the above requirement as detailed in our <a href="#">Minimum Standards Reporting Checklist</a>?</p> | <p>Yes</p> |

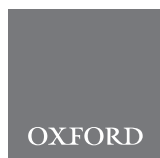

## REVIEW

## Os and Is in marine molecular research: a regional HPC perspective

Haris Zafeiropoulos<sup>1,2,\*</sup>, Anastasia Gioti<sup>1,\*</sup>, Stelios Ninidakis<sup>1</sup>, Antonis Potirakis<sup>1</sup>, Savvas Paragkamian<sup>1,2</sup>, Nelina Angelova<sup>1</sup>, Aglaia Antoniou<sup>1</sup>, Theodoros Danis<sup>1,3</sup>, Eliza Kaitetzidou<sup>1</sup>, Panagiotis Kasapidis<sup>1</sup>, Jon Bent Kristoffersen<sup>1</sup>, Vasileios Papadogiannis<sup>1</sup>, Christina Pavloudi<sup>1</sup>, Quoc Viet Ha<sup>4</sup>, Jacques Lagnel<sup>5</sup>, Nikos Pattakos<sup>1</sup>, Giorgos Perantinos<sup>1</sup>, Dimitris Sidirokastritis<sup>6</sup>, Panagiotis Vavilis<sup>6</sup>, Georgios Kotoulas<sup>1</sup>, Tereza Manousaki<sup>1</sup>, Elena Sarropoulou<sup>1</sup>, Costas S Tsigenopoulos<sup>1</sup>, Christos Arvanitidis<sup>1,7</sup>, Antonios Magoulas<sup>1</sup> and Evangelos Pafilis<sup>1,†</sup>

<sup>1</sup>Hellenic Centre for Marine Research (HCMR), Institute of Marine Biology, Biotechnology and Aquaculture (IMBBC), Former U.S. Base of Gournes, P.O. Box 2214, 71003, Heraklion, Crete, Greece and <sup>2</sup>Department of Biology, University of Crete, Voutes University Campus, P.O.Box 2208, 70013, Heraklion, Crete, Greece and <sup>3</sup>Greece School of Medicine, University of Crete and <sup>4</sup>BULL SAS, rue du gros caillou, 78340 Les Clayes-sous-Bois, France and <sup>5</sup>INRAE, UR1052, Génétique et Amélioration des Fruits et Légumes (GAFL), 67 Allée des Chênes, Centre de Recherche PACA, Domaine Saint Maurice, CS60094, 84143 Montfavet, France and <sup>6</sup>Hellenic Centre for Marine Research (HCMR), Network Operation Center, Former U.S. Base of Gournes, P.O. Box 2214, 71003, Heraklion, Crete, Greece and <sup>7</sup>LifeWatch ERIC, Sector II-III Plaza de España, 41071, Seville, Spain

\*Contributed equally

†Corresponding author: [pfafis@hcmr.gr](mailto:pfafis@hcmr.gr)

### Abstract

**Background** High-performance computing (HPC) systems have become indispensable for modern marine research, providing support to an increasing number and diversity of users. Pairing with the impetus offered by high-throughput methods to key areas such as non-model organism studies, their operation continuously evolves to meet the corresponding computational challenges. **Results** Here we present a Tier-2 (regional) HPC facility, operating for over a decade at the Institute of Marine Biology, Biotechnology, and Aquaculture (IMBBC) of the Hellenic Centre for Marine Research in Greece. Strategic choices made in design and upgrades aimed to strike a balance between depth (the need for a few high-memory nodes) and breadth (a number of slimmer nodes), as dictated by the idiosyncrasy of the supported research. Qualitative computational requirement analysis of the latter revealed the diversity of marine fields, methods and approaches adopted to translate data into knowledge. In addition, hardware and software architectures, usage statistics, policy and user management aspects of the facility are presented. **Conclusions** Drawing upon the last decade's experience from the different levels of operation of the IMBBC HPC facility, a number of lessons are presented; these have contributed to the facility's future directions, in the light of emerging distribution technologies (e.g. containers) and Research Infrastructure evolution. In combination with detailed knowledge of the facility usage and its upcoming upgrade, future collaborations in marine research and beyond are envisioned.

**Key words:** marine research; high performance computing (HPC); containerization; computational requirements; high-throughput sequencing (HTS); research infrastructures (RIs); biodiversity; biotechnology; aquaculture

## Background

The ubiquitous marine environments (more than 70% of the global surface [1]) mold Earth's conditions to a great extent. The interconnected abiotic [2] and biotic factors (from Bacteria [2] to megafauna [3]), shape biogeochemical cycles [4] and climate [5, 6] from a local to the global scale. In addition, marine systems have high socio-economic value [7] as an essential source of food and by supporting renewable energy and transport among other services [8]. The study of marine environments involves a series of disciplines (scientific fields); from Biodiversity [9] and Oceanography to (eco)systems biology [10], and from Biotechnology [11] to Aquaculture [12].

To shed light on the evolutionary history of (commercially important) marine species [13] as well as on how invasive species respond and adapt to novel environments [14] the analysis of their genetic stock structure is fundamental [15]. Similarly, biodiversity assessment is essential to elucidate ecosystem functioning [16] and to identify taxa with potential for bioprospecting applications [17]. Furthermore, systems biology approaches provide both a theoretical and a technical background for integrative analyses to flourish [18]. However, conventional methods do not offer the information needed to explore the aforementioned scientific topics.

High-throughput sequencing (HTS) and sister methods have launched a new era in many biological disciplines [19, 20]. These technologies allowed access to the genetic, transcript, protein and metabolite repertoire [21] of studied taxa or populations, and facilitated the analysis of organism-environment interactions in communities and ecosystems [22]. Whole Genome Sequencing (WGS) and Whole Transcriptome Sequencing (WTS) approaches provide valuable information for the study of non-model taxa [23]. This information can be further enriched by genotyping-by-sequencing approaches, for instance Restriction site-associated DNA sequencing (RAD-seq) [24], or by investigating gene expression dynamics through Differential Expression (DE) analyses [25]. Moving from single species to assemblages, molecular-based identification and functional profiling of communities has become available through marker, genome or transcriptome sequencing from environmental DNA (eDNA) (metabarcoding, metagenomics, meta-transcriptomics) [26]. These methods address the problem of "how to produce and get access to the information?" on different biological systems and molecules to a great extent.

These 0's and 1's of information (i.e the data) come along with challenges regarding their management, analysis and integration [27]. The computational requirements for these tasks by far exceed the capacity of a standard laptop/desktop by far, owing to the sheer volume of the data and to the computational complexity of the bioinformatic algorithms employed for their analysis. For example, building the *de novo* genome assembly of a non-model Eukaryote may require algorithms of nondeterministic polynomial time ((NP)-complete problem) complexity. This analysis can reach up to several hundreds or thousands of GB of memory (RAM) [28]. Hence, the challenges of "how to exploit all these data?" and "how to transform data into knowledge" set the present framework in biological research [29, 30].

To address these computational challenges, the use of High-Performance Computing (HPC) systems has become essential in life sciences and systems biology [31]. HPC is the scientific field that aims at the optimal incorporation of technology, methodology, and application thereof to achieve "the greatest computing capability possible at any point in time and technology" [32]. Such systems range from a small number to several thousands of interconnected computers (compute nodes). According to the Partnership for Advanced Computing in Europe (PRACE), the European HPC facilities

are categorized in: a. European Centres (Tier-0), b. national (Tier-1) and c. regional (Tier-2) centres [33]. As PRACE highlights, "computing drives science and science drives computing" in a great range of scientific fields; from the endeavor to maintain a sustainable Earth, to the efforts for expanding the frontiers in our understanding of the universe [34]. On top of the heavy computational requirements, biological analyses come with a series of other practical issues that often affect the bioinformatics-oriented HPC systems.

Researchers with purely biological background often lack the coding skills or even the familiarity required for working with Command Line Interfaces (CLI) [34]. Virtual Research Environments (VREs) are web-based e-services platforms, particularly useful for researchers lacking expertise or / and computing resources [35]. Another common issue is that most analyses include a great number of steps, with the software used in each of these having equally numerous dependencies. Lack of continuous support for tools with different dependencies, as well as frequent and non-periodical versioning of the latter, often results in broken links and further compromises the reproducibility of analyses [36]. Widely-used containerization technologies, e.g. Docker [37] and Singularity [38] ensure reproducibility of software and replication of the analysis, thus partially addressing these challenges. By encapsulating software code along with all its corresponding dependencies in such containers, software packages become reproducible in any operating system in an easy-to-download-and-install fashion, on any infrastructure.

The Institute of Marine Biology Biotechnology and Aquaculture (IMBBC) has been developing a computing hub which, in conjunction with national and European Research Infrastructures (RIs), to support state of the art marine research. The regional IMBBC HPC facility allows processing of data that derive from the Institute's sequencing platforms and expeditions, and from multiple external sources in the context of interdisciplinary studies. Here, we present insights from a thorough analysis of the research supported by the facility and some of its latest usage statistics in terms of resource requirements, computational methods and data types; the above have contributed in shaping the facility along its lifespan.

## The IMBBC HPC facility from a single server to a Tier-2 system

The IMBBC HPC facility was launched in 2009 to support the computational needs over a range of scientific fields in marine biology, with a focus on non-model taxa [39]. The facility was initiated as an infrastructure of the hitherto Institute of Marine Biology and Genetics (IMBG) of the Hellenic Centre for Marine Research (HCMR). Its development has followed the development of national RIs (Fig 1, also see [40] Section A1). The first nodes were used to support the analysis of datasets generated from methods such as eDNA metabarcoding and multiple omics. Since 2015, the facility also supports VREs, including e-services and virtual laboratories (vLabs). The current configuration of the facility presented herein is named *Zorba* (box 4 in Fig. 1) and will be upgraded within 2021 (see Section 8). Hereafter, *Zorba* refers to the specific system setup from 2015 and onwards, while the facility throughout its lifespan will be referred to as "IMBBC HPC".

*Zorba* currently consists of 328 CPU cores, 2.3 TB total memory and 105 TB storage. Job submission takes place on the four available computing partitions, or queues, as explained in Fig. 2. *Zorba* at its current state achieves a peak performance of 8.3 trillion double-precision floating-point operations per second, or 8.3 Tflops, as estimated by LinPack benchmarking [41]. On top of these, a total 7.5 TB is distributed to all servers for the storage of environment and

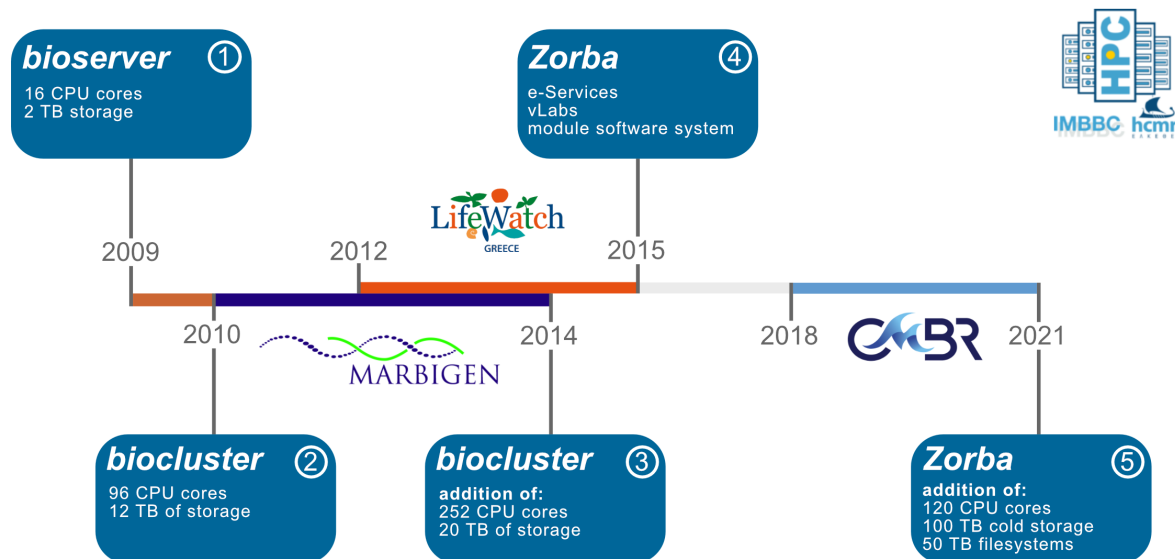

**Figure 1.** Evolution of the IMBBC HPC facility during the past 12 years, with hardware upgrade (blue boxes) and funding milestones (logos of RIs) highlighted. A single server that launched the bioinformatics era in 2009 evolved to the current Tier-2 system Zorba (box 4), which allows processing a wide variety of information from DNA sequences to biodiversity data. Different names of the facility denote distinct system architectures.

system files. A thorough technical description of *Zorba* is available at (see [40] Section A2).

More than [200 software packages](#) are currently installed and available to users at *Zorba*, covering the most common analysis types. These tools allow assembly, HTS data preprocessing, phylogenetic tree construction, ortholog finding, population structure modeling, to name a few. Access to these packages is provided through [Environment Modules](#), a broadly-used means of accessing software in HPC systems [42].

During the last two years, *Zorba* has been moving from system – dependent pipelines previously developed at IMBBC (e.g. [ParaMetabarCoding](#)) towards containerization of available and new pipelines/tools. A complete metabarcoding analysis tool for various marker genes (PEMA) [43], the chained and automated use of STACKS, software for population genetics analysis from short-length sequences [44] ([latest version](#)), a set of statistical functions in R for the computation of biodiversity indices and analyses in cases of high computational demands [45], as well as a programming workflow for the automation of biodiversity historical data curation (DECO) are among the in-house developed containers. A thorough description of the software containers developed in *Zorba* can be found in the [40] Section D. Singularity images can be served by any *Zorba* partition; Docker images can run instantly as Singularity images. *Zorba* daily function is ensured by a core team of four full-time experienced staff: a hardware officer, two system administrators, and a permanent researcher in biodiversity informatics and data science.

More than 70 users (internal and external scientists), investigators, postdoctoral researchers, technicians, and doctoral / postgraduate students have gained access to the HPC infrastructure until today. Support is provided officially through a helpdesk ticketing system. An average of 31 requests/month have been received (since June 2019), with the most demanded categories being troubleshooting (38.2%) and software installation (23.8%). Since October 2017, monthly meetings among HPC users have been established to regularly discuss such issues.

Proper scheduling of the submitted jobs and fair resource sharing is a major task that needs to be confronted day-to-day. To address this, a specific [usage policy](#), for each of the various partitions, and a scheduling software tool set have been adopted in *Zorba*.

Policy terms are dynamically adapted to the HPC hardware architecture and to the usage statistics, with revisions being discussed between the HPC core team and users. Simple Linux Utility for Resource Management (SLURM) open-source cluster management system orchestrates the job scheduling along with the allocation of resources and a [booking system](#) helps users to organize their projects and administrators to monitor the resource reservations on a mid-long term basis. A SLURM Database Daemon (slurmdbd) has also been installed to allow logging and recording of job usage statistics into a separate SQL database (see PREPRINT). An extended description of user and job administration and orchestration can be found at (see [40] Section C1).

Training is an integral component of the HPC facility mindset since its launch and enables knowledge sharing across MSc, PhD students and researchers within and outside the Institute. Introductory courses are organized on a regular basis, aiming at familiarizing new users with Unix environments, programming, and HPC usage policy and resource allocation (e.g. job submission in SLURM). Furthermore, the IMBBC HPC facility has served, since 2011, as an international training platform for specific types of bioinformatic analyses (see [40] Section C2). For instance, the facility has provided computational resources for workshops on [Microbial diversity](#), [Genomics and Metagenomics](#), [Genomics in Biodiversity](#), [Next Generation Sequencing technologies and informatics tools for studying marine biodiversity and adaptation in the long term](#), or [Ecological Data Analysis using R \(ECODAR\)](#). The plan is to enhance and diversify the educational component of the HPC facility by providing courses on a more permanent basis and targeting a larger audience. An extensive listing of training activities is given at [40] Section C2.

## Computational breakdown of the IMBBC HPC-supported research

Systematic labelling of IMBBC HPC-supported published studies ( $n=47$ ) was performed to highlight their resource requirements. Each study was manually labelled with the relevant scientific field, the data acquisition method, the computational methods, and its resource requirements; all the annotations were validated by the

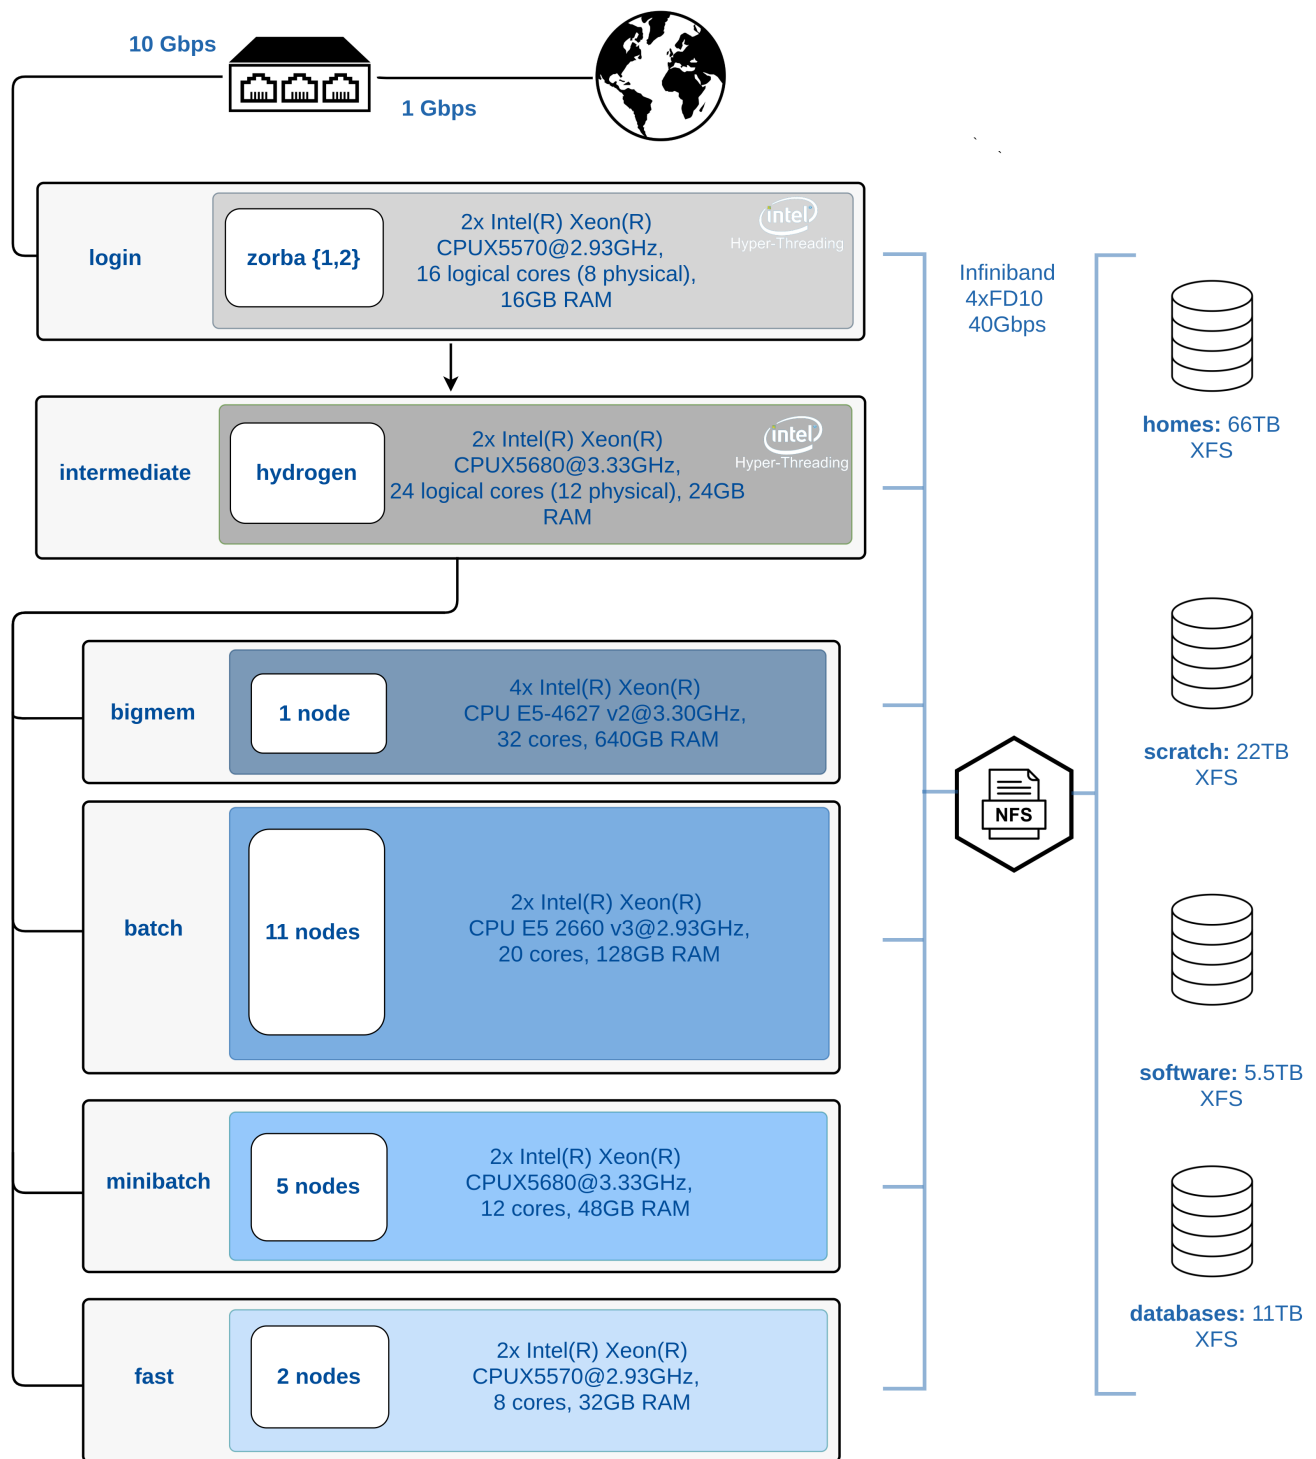

**Figure 2.** Block diagram of the Zorba architecture. This is the IMBBC HPC facility architecture in its current setup, after 12 years of development. There are 2 login nodes and one intermediate where users may develop their analyses. Computational nodes are split into 4 partitions with different specs and policy terms: *bigmem* supporting processes requiring up to 640 GB RAM, *batch* handling mostly (but not exclusively) parallel-driven jobs (either in a single node or across several nodes), *minibatch* aiming to serve parallel jobs with reduced resource requirements and fast partition for non-intensive jobs. All servers, except file systems, run Debian 9 (kernel 4.9.0-8-amd64).

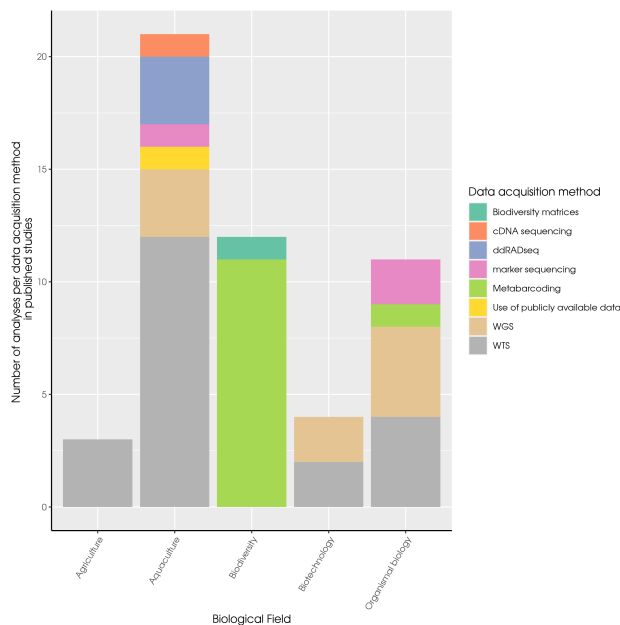

**Figure 3.** Bar chart with the number of publications that have used IMBBC HPC facility resources, grouped per scientific field. The different methods for data acquisition are also presented. WGS: whole-genome sequencing; WTS: whole-transcriptome sequencing.

corresponding authors (see [40] Section D2). It should be stated that the conclusions of this overview are specific to the studies conducted at IMBBC.

The scientific fields of Aquaculture (~40% of studies), Biodiversity (~26% of studies) and Organismal biology (~19% of studies) account for the majority of the research publications supported by the IMBBC HPC facility (Fig. 3 and [40] Supplementary file 1).

On the other hand, studies in the Biotechnology and Agriculture fields indicate contemporary and beyond-marine orientations of research at IMBBC, respectively (see [40] Section B2). In addition, eight methods of data acquisition (experimental or in silico) have been defined (Fig. 3). Among these methods, WGS and WTS have been widely used in multiple fields (Biotechnology, Organismal Biology, Aquaculture). Conversely, ddRAD sequencing has been solely employed for population genetic studies in the context of Aquaculture.

The 47 published studies employed different computational methods (sets of tasks executed on the HPC facility). These studies served different purposes, from a range of bioinformatics analyses to HPC-oriented software optimization. The computational methods were categorized in eight classes (Fig. 4). The resource requirements of each computational method were evaluated in terms of memory usage, computational time and storage. Reflecting the current *Zorba* capacity, studies which, in any part of their analysis, exceeded 128 GB of memory or/and 48 hours of running time or/and 200 GB physical space were classified as studies with high demands (see [40] Supplementary file: *imbbc\_hpc\_labelling\_data.xlsx*).

As shown in Fig. 3, the two most commonly used computational methods have rather different resource requirements. While "differential expression (DE) analysis" shows a notable trend for both long computational time (Fig. 3A), and high memory (Fig. 3B), "eDNA-based community analysis" does not have high resource requirements either in computation time or memory. High memory was commonly associated with computational methods including *de novo* assembly; all relevant research concerned non-model taxa and involved short-read sequencing or combinations of short- and long-read sequencing. By contrast, "phylogenetic analysis" did not involve intensive RAM use; this is largely due to the fact that software used by IMBBC users adopts parallel solutions for tree

construction. Long computational times (Fig. 3A) were most often observed at the functional annotation step in "transcriptome analysis", "DE analysis" and "comparative and evolutionary omics", when this step involved BLAST queries of thousands of predicted genes against large databases such as nr (NCBI). Finally, a common challenge emerging from all bioinformatic approaches is the significant storage limitations (Fig. 3C); this challenge was associated with the use of HTS technologies that produce large raw data, and the analysis of which involves creation of numerous intermediate files.

Overall, published studies using the IMBBC HPC facility show a degree of variance with respect to the types of tools used (depending on the user, its bioinformatic literacy, and other factors), each of which is more or less optimized with respect to HPC use. Moreover, the variance in computational needs observed within each type of computational method, reflects the diversity of the studied taxonomic groups. For instance, "transcriptome analysis" (involving *de novo* assembly and functional annotation steps) was employed for the study of taxa as diverse as Bacteria, sponges, Fungi, fish and goose barnacles. The complexity of each of these organisms' transcriptomes can explain to a large extent the differences observed in computational time, memory and storage.

Furthermore, *Zorba* CPU and RAM statistics collected since 2019 allowed observing some overall patterns: An average computation load per month of less than or close to 50% of its max capacity (50% of 236 kilocorehours/month) for most (20) out of the 24 months of the logging period was one of these. Memory requirements were also heterogeneous: most (90%) of a 44K jobs performed in the same 24 month period, required less than 10 GB of RAM. 0.30% of the jobs required more than 128 GB of RAM, i.e. exceeding the memory capacity of the main compute nodes (*batch* partition). The detailed usage statistics of *Zorba* are described in [40] Section B1 and Supplementary file: *zorba\_usage\_statistics.xlsx*.

## Scientific impact stories

Below, some examples of research results that were made possible with the IMBBC HPC facility are described. This list of "use cases" is by no means exhaustive, but rather an attempt to highlight different fields of research supported by the facility along with their distinct computational features.

### Invasive species range expansion detected with eDNA data from ARMS

The Mediterranean biodiversity and ecosystems are experiencing profound transformations owing to Lessepsian migration, international shipping, and aquaculture, which lead to the migration of nearly 1000 alien species [46]. The first step towards addressing the effects of these invasions is the monitoring of the introduced taxa. eDNA metabarcoding has proved a powerful tool in this direction, allowing detection of invasive species [47], often preceding macroscopic detection. One such example is the first record of the nudibranch *Anteaeolidiella lurana* (Ev. Marcus & Er. Marcus, 1967) in Greek waters in 2020 [48]. eDNA metabarcoding analysis allowed detecting the species with high confidence on fouling communities developed on Autonomous Reef Monitoring Structures (ARMS). This finding, confirmed with image analysis of photographic records on a later deployment period, is an example of work conducted within the framework of the European ASSEMBLE plus programme (ARMS-MBON). PEMA software [43] was used in this study as well as in the 30-month pilot phase of ARMS-MBON [49].

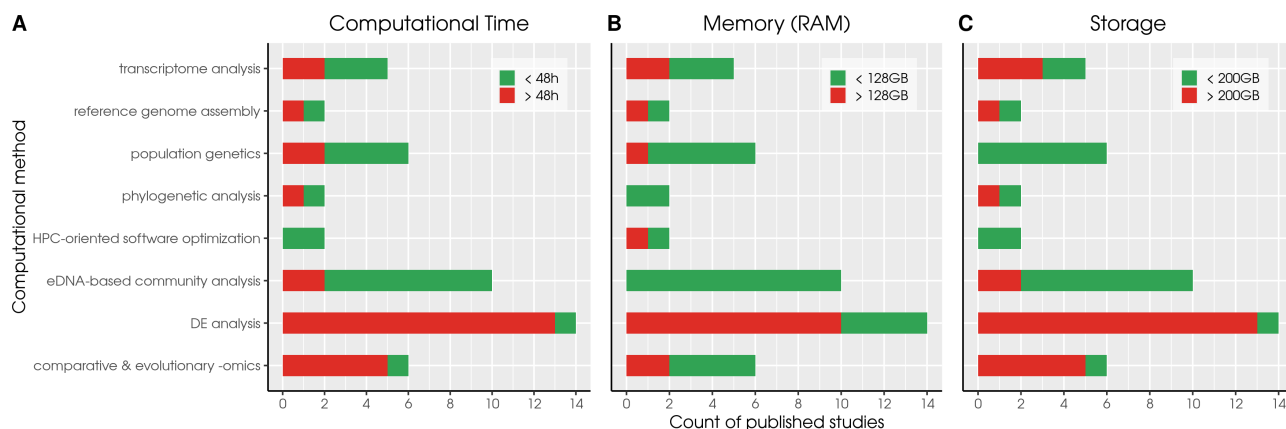

**Figure 4.** Resource requirements of the various computational methods employed at the IMBBC HPC facility to support published research A) long computational time (>48h), B) high memory (>128 GB) high storage requirements (>200 GB) and C). Red color denotes studies with high requirement for a certain HPC feature. For instance, all eDNA-based community analyses performed at Zorba until now have not required long computational time.

### Providing omics resources for large genome-size, non-model taxa

Zorba has been used for building and annotating numerous de novo genome and transcriptome assemblies of marine species such as the gilthead sea bream *Sparus aurata* [50] or the greater amberjack *Seriola dumerili* [51]. Both genome and transcriptome assemblies of species with large genomes often exceed the maximum available memory limit, eventually affecting the strategic choices for Zorba future upgrades (see Section 8). For instance, building the draft genome assembly of the seagrass *Halophila stipulacea* (estimated genome size 3.5 GB) using Illumina short reads has been challenging even for seemingly simple tasks such as a kmer analysis [52]. Taking advantage of short and long-read sequencing technologies to construct high-quality reference genomes, the near-chromosome level genome assembly of *Lagocephalus sceleratus* (Gmelin, 1789) was recently completed, as a case study of high ecological interest due to the species' successful invasion throughout the Eastern Mediterranean [53]. In the context of this study, an automated containerized pipeline allowing high-quality genome assemblies from Oxford Nanopore and Illumina data was developed (SnakeCube, [54]). The availability of standardized pipelines offers great perspectives for in-depth studies of numerous marine species of interest in aquaculture and conservation biology, including rigorous phylogenomic analyses to position each species in the tree of life (e.g. [55]).

### DE analysis of aquaculture fish species sheds light on critical phenotypes

Distinct observable properties such as morphology, development, and behavior, characterize living taxa. The corresponding phenotypes may be controlled by the interplay between specific genotypes and the environment. To capture an individual's genotype at a specific time point, molecular tools for transcript quantification have followed the fast development of technologies, with Expressed Sequence Tags (EST) being the first approach to be historically used, especially suited for non-model taxa [56]. Nowadays, the physiological state of aquaculture species is retrieved through investigation of stage-specific and immune- and stress response-specific transcriptomic profiles using RNAseq. The corresponding computational workflows involve installing various tools at Zorba and implementing a series of steps that often take days to compute. These analyses, besides detecting transcripts at a specific physiological state, have successfully identified regulatory elements such as microRNAs. Through the construction of a regulatory net-

work with putative target genes, microRNAs have been linked to the transcriptome expression patterns. The most recent example is the identification of microRNAs and their putative target genes involved in ovary maturation [57].

### Large-scale ecological statistics: Are all taxa equal?

The nomenclature of living organisms, as well as their description and their classification under a specific nomenclature code, have been studied for more than two centuries. Up to now, all the species present in an ecosystem are considered *equal*, in terms of their contribution to diversity. However, this "axiom" has been tested only once before, on the UK's marine animal phyla, showing the inconsistency of the traditional Linnaean classification between different major groups [58]). In [59] the average taxonomic distinctness index ( $\Delta^+$ ) and its variation ( $\Lambda^{+}$ ) were calculated on a matrix deriving from the complete World Register of Marine Species (WoRMS) [60], containing more than 250,000 described species of marine animals. It is the R-vLab web application along with its HPC high RAM back-end components (on bigmem, see Section 2) that made such a calculation possible. This is the first time such a hypothesis is tested on a global scale. Preliminary results show that the two biodiversity indices exhibit complementary patterns and that there is a highly significant, yet non-linear relationship between the number of species within a phylum and the average distance through the taxonomic hierarchy.

### Discovery of novel enzymes for bioremediation

Polychlorinated biphenyls (PCBs) are complex, recalcitrant pollutants that pose a serious threat to wildlife and human health. Identification of novel enzymes that can degrade such organic pollutants is intensively studied in the emerging field of bioremediation. In the context of the [Horizon 2020 TASCAR project](#), global ocean sampling provided a large biobank of fungal invertebrate symbionts, and through large-scale screening and bioreactor culturing, a marine-derived fungus able to remove a PCB compound was identified for the first time. Zorba resources and domain expertise in fungal genomics were used as a CMBR service for the analysis of multi-omic data for this symbiont. Following genome assembly of *Cladosporium* sp. TM-S3 [61], transcriptome assembly and phylogenetic analysis revealed the full diversity of the symbiont's multicopper oxidases, enzymes commonly involved in oxidative degradation [62]. Among these, two laccase-like proteins shown to remove up to 71% of the PCB compound are now being expressed to optimize their use as novel biocatalysts. This step would not have

been possible without the annotation of the *Cladosporium* genome with transcriptome data; mapping of the purified enzymes' LC-MS spectra against the set of predicted proteins allowed to identify their corresponding sequences.

## Lessons learned

### Depth and breadth are both required for a bioinformatics-oriented HPC

In our experience, the vast majority of the analyses run at the IMBBC HPC infrastructure are CPU-intensive. RAM-intensive jobs (>128 GB RAM, see Section 3) represent only ~0.3% of the total jobs executed over the last 2 years (see [40] Section B1). Despite the difference in frequency of executed jobs with distinct requirements, serving both types of jobs and ensuring their successful completion is equally important for addressing fundamental marine research questions (as shown in Section 3). The need for both HPC depth (the need for a few high-memory nodes) and breadth (a number of slimmer nodes) has been previously reported [31]. This need reflects the idiosyncrasy of different bioinformatics analysis steps, often even within the same workflow. High-memory nodes are cannot-do-without for tasks such as de novo assembly of large genomes, while the availability of as many as possible less powerful nodes can speed up the execution of less demanding tasks, and free resources for other users to compute. Future research directions and the available budget further dictate tailoring of the HPC depth and breadth. Cloud-based services, e.g. for containerized workflows, may also facilitate this process once these become more affordable.

### Quota... overloaded

We observed that independently of the type of analysis, storage was an issue for all Zorba users (Fig. 4). A high percentage of these issues relate to the raw data from HTS projects. These data are permanently stored in the home directories, occupying significant space. This, in conjunction with the fact that users delete their data with great reluctance, makes storage one of the major issues of daily use in Zorba. In specific cases where users' quota was exceeded uncontrollably, the Zorba team has been applying compression of raw and output data in contact with the user, but this is by no means a stable strategy. More generally, the performance of the existing storage configuration in Zorba being close to reaching its limits with the increase in users and its concurrent use, several solutions have been adopted to resolve the issue. The most long-lasting solution has been the adoption of a per-user quota system to allow storage sustainability and fairness in our allocation policy. This quota system constitutes nevertheless a limiting factor in pipeline execution, since lots of software tools produce unpredictably too many intermediate files, which not only increase storage but also cause job failures due to space restrictions. We managed the above issue by adding a `scratch` filesystem as an intermediate storage area for the runtime capacity needs. Following completion of their analysis, users retain only the useful files and the rest are permanently removed. A significant storage upgrade is scheduled within 2021 (see Section 8).

### Continuous intercommunication among different disciplines matters

Smooth function of an HPC system and exploitation of its full potential for research requires stable employment of a core team of computer scientists and engineers, in close collaboration with an extended team of researchers. At least four disciplines are involved in Zorba-related issues: Computer scientists, Engineers, Biologists (in

the broad sense, including ecologists, genomicists, etc.), and Bioinformaticians with varying degrees of literacy in Biology and Informatics and various domain specializations (comparative genomics, biodiversity informatics, bacterial metagenomics, etc). Continuous communication among representatives of these four disciplines has been substantial to research supported by Zorba and to the evolution of the HPC system itself over time. In our experience, an HPC system cannot function effectively and for long without full-time system administrators, nor with bioinformaticians alone. Although it has not been the case since the system's onset, investment in monthly meetings, seminars, and training events (in biology, containers, domain-specific applications, and computer science, see Section 2) are the only way to establish stable intercommunication among different players of an HPC system. Such proximity translates into timely and adequate systems and bioinformatics analysis support; an element that in its turn translates into successful research (See Section 3). It should be noted that the overall good experience in connectivity among different HPC "players" derives from Zorba being a Tier-2 system, with a number of active permanent users in the order of tens. The establishment of such inter-communication was relatively straightforward to implement with periodic meetings and the assistance of ticketing and other management solutions (see [40] Section C1).

### The way forward: Develop locally, share and deploy centrally

The various approaches regarding the function of an HPC system are strongly related to the different viewpoints of the academic communities towards the relatively new disciplines of Bioinformatics and Big Data. These approaches are strongly affected by national and international decisions that affect the ability to fund supercomputer systems. There are advantages in deploying bioinformatics-oriented HPC systems in centralized (Tier-0, Tier-1) facilities. Better prices at hardware purchases, easier access to HPC-tailored facilities, for instance in terms of the cooling system and physical space, or experienced technical personnel (see also [31]). However, synergies between regional (Tier-2) and centralized HPC systems are fundamental for moving forward in supporting the diverse and demanding needs of bioinformatics. An example of such synergies concerns technical solutions (e.g. containerization) that address long-standing software sharing issues. In our experience, a workflow/pipeline can be developed by experts within the context of a specific project in a regional HPC facility. Once a production version of the pipeline is packaged, it can be distributed to centralized systems to cover a broader user audience (see Section 2).

### Software optimizations for parallel execution

The most common ways of achieving implicit or explicit parallelization in modern multicore systems for Bioinformatics, Computational Biology, and Systems Biology software tools, are the software threads – provided by programming languages – and/or the OpenMP API [63]. These types of multiprocessing make good use of the available cores on a multicore system (single node), but they are not capable of combining the available CPU cores from more than one node. Some other software tools use Message Passing Interface (MPI) to spawn processing chunks to many servers and/or cores, or (even better) combine MPI with OpenMP/Threads to maximize the parallelization in Hybrid models of concurrency. Such designs are now used to a great extent in some cases, such as phylogeny inference software that makes use of Monte Carlo Markov Chain (MCMC) samplers. However, these cases are but a small number compared to the majority of bioinformatics tasks, while their usage in other analyses is low. At the hardware level, simultaneous multi-threading is not enabled in the compute nodes of the IMBBC HPC infrastructure. Since the majority of analyses running on the cluster

demand dedicated cores, hardware multithreading does not perform well. In our experience, the existence of more (logical) cores in compute nodes misleads the least experienced users into using more threads than the physically available ones, which slows down their executions. On the other hand, assisting servers (filesystems, login nodes, web servers) make use of hardware multithreading, since they serve numerous small tasks from different users/sources which commonly contain I/O operations. Graphics Processing Units (GPUs) provide an alternative way for parallel execution, but they are supported by a limited number of bioinformatics software tools. Nevertheless, GPUs can optimize the execution process in specific, widely-used bioinformatic analyses, such as sequence alignment [64, 65], image processing in microtomography (e.g. microCT), or basecalling of Nanopore raw data.

## Future Directions

An upgrade of the existing hardware design of *Zorba* has been scheduled in 2021, funded by the CMBR RI (Fig. 1). More specifically:

- i. 3 nodes of 40 CPU physical cores will be added through new partitions (120 cores in total)
- ii. the total RAM will be increased by 3.5 TB
- iii. 100 TB of cold storage will be installed and is expected to alleviate the archiving problem at the existing homes/scratch file systems
- iv. the total usable existing storage capacity for users in home and scratch partitions will be increased by approximately 100 TB

With this upgrade, it is expected that the total computational power of *Zorba* will be increased by approximately 6 TFlops, while the infrastructure will be capable of serving memory-intensive jobs requiring up to 1.5 TB of RAM, hosted on a single node. Eventually, more users will be able to concurrently load and analyze big datasets on the filesystems. Over the coming 2 years, *Zorba* is also expected to have two major additions:

- i. the acquisition of a number of GPU nodes to build a new partition especially for serving software that has been ported to run on GPUs
- ii. the design of a parallel file system (Ceph or Lustre) to optimize concurrent I/O operations to speed up CPU-intensive jobs.

The expectation is that the upcoming upgrade of *Zorba* will further enhance collaborations with external users, since the types of bioinformatic tasks supported by the infrastructure are common to other disciplines beyond marine science, such as environmental omics research in the broad term. A national-wide survey targeting the community of researchers studying the environment and adopting the same approaches (HTS, biodiversity monitoring) has revealed that their computational and training needs are on the rise (A. Gioti et al., unpublished observations). Usage peaks and valleys were observed in *Zorba* (see [40] Section B1), similarly to other HTS-oriented HPC systems [31]. It is therefore feasible to share *Zorba* idling time with other scientific communities. Besides, the *Zorba* upgrade comes very timely in a period where additional computational infrastructures emerge: The [Cloud infrastructure EG-CI](#), funded by the Greek node of ELIXIR, is currently at the pre-production phase. It will constitute a national Tier-1 HPC facility, designed to host ~50 computational nodes of different capabilities (regular servers, GPU-enabled servers, SSD-enabled servers, etc), and provide users the option to either create custom Virtual Machines for their computational services or to upload and execute workflows of containerised scientific software packages. In this context, a strategic combination of *Zorba* and EG-CI capabilities is expected to build a strong computational basis in Greece. It is also expected that *Zorba* functionality will be augmented through its

connection with the Super Computing Installations of LifeWatch ERIC (e.g. Picasso facility in Malaga, Spain). Building upon the lessons learned of the last twelve years, a foreseeable challenge for the facility is the enhancement of its usage monitoring to the example of international HPC systems [66], in order to allow even more efficient use of computational resources.

## Conclusions

*Zorba* is an established Tier-2 HPC regional facility operating in Crete, Greece. It serves as an interdisciplinary computing hub in the eastern Mediterranean, where studies in marine conservation, invasive species, extreme environments, and aquaculture are of great scientific and socio-economic interest. The facility has supported, since its launch over a decade ago, a number of different fields of marine research, covering all kingdoms of life; it can also share part of its resources to support research beyond the marine sciences.

The operational structure of *Zorba* enables continuous communication between users and administrators for more effective user support, troubleshooting and job scheduling. More specifically, training, regular meetings and containerization of in-house pipelines have proven constructive for all teams, students and collaborators of IMBBC. This operational structure has evolved over the years based on the needs of the facility's users and the available resources. The practical solutions adopted, from hardware (e.g. depth/breadth balanced structure, user quotas and temporary storage), to software (e.g. modularized bioinformatics application maintenance and containerization) and human resource management (e.g. frequent intercommunication, continuous cross-discipline training) reflect IMBBC research to a large extent. However, and by incrementing previous reviews [31], other Institutes and HPC facilities can be informed on the lessons learned (see Section 7), and reflect on the computational requirement analysis of the methods presented (see Section 3) through the spectrum of their own research so as to plan ahead.

HPC facilities could reach a benefit greater than the sum of their capacities once they interconnect. The IMBBC HPC facility lies at the crossroad of three RIs, CMBR (Greek node of EMBRC-ERIC), LifeWatchGreece (Greek node of LifeWatch ERIC) and ELIXIR Greece, and will pursue via these further collaboration at larger Tier-0 and Tier-1 levels.

## Availability of supporting data and materials

The data sets supporting the results of this article are available in the following [Zenodo](#) repository.

## Declarations

## List of abbreviations

ARMS: Autonomous Reef Monitoring Structures ; CLI: Command Line Interfaces ; DE: Differential Expression ; eDNA: environmental DNA ; EST: Expressed Sequence Tags ; GPUs: Graphics Processing Units ; HCMR: Hellenic Centre for Marine Research ; HPC: high performance computing ; HTS: high-throughput sequencing ; IMBBC: Institute of Marine Biology, Biotechnology and Aquaculture ; IMBG: Institute of Marine Biology and Genetics ; MCMC: Monte Carlo Markov Chain ; MPI: Message Passing Interface ; NP: nondeterministic polynomial ; PCBs: Polychlorinated biphenyls ; RAD-seq: Restriction site-associated DNA sequencing ; RIs: research infrastructures ; SLURM: Simple Linux Utility for Resource Management ; vLabs: virtual laboratories ; VREs: Virtual Research Environments ; WGS: Whole Genome Sequencing ; WTS: Whole Transcriptome

Sequencing ; WoRMS: World Register of Marine Species

### Ethical Approval (optional)

Not applicable.

### Consent for publication

Not applicable.

### Competing Interests

The authors declare that they have no competing interests.

### Funding

Funding the IMBBC HPC facility was made available through the [MARBIGEN](#) project No. FP7-REGPOT-2010-1, the [LifeWatchGreece](#) Research Infrastructure (MIS 384676) and the [Centre for the study and sustainable exploitation of Marine Biological Resources \(CMBR\)](#) (MIS 5002670) Research Infrastructure, which is implemented under the Action "Reinforcement of the Research and Innovation Infrastructure", funded by the Operational Programme [Competitiveness, Entrepreneurship and Innovation](#) (NSRF 2014–2020) and co-financed by Greece and the European Union (European Regional Development Fund).

CMBR has also funded several authors of this study (SN, AP, AA, SP, JK). Additional support to HZ, AG, SN was provided by the ["ELIXIR-GR: Managing and Analysing Life Sciences Data"](#) (MIS: 5002780) project, co-financed by Greece and the European Union – European Regional Development Fund. Additional support to AA was provided by the [MODern UNifying Trends in marine biology \(MOUNT\)](#) (MIS 5002470) funded by EPANAK. EK received support from the from the [Greater Amberjack](#) project (No. OPF2020). GP, NP were supported by the LifeWatchGreece, funded by the Greek Government under the General Secretariat of Research and Technology (GSRT), ESFRI Projects, National Strategic Reference Framework (NSRF). NA received support from the MED UNITS project; TD, VP, CT from the [AQUAEXCEL 2020](#) research infrastructure project (No. 652831); VP was also supported by [MeagreGEN](#); CP was supported by the [BIOIMAGING-GR](#) research infrastructure (MIS 5002755). CST was also supported by [ParaFishControl](#) (No. 634429) and [Per-formFISH](#) (No. 727610). CA received support from [LifeWatch ERIC](#).

### Author's Contributions

E.P., H.Z. and A.G. conceived the study, performed investigation, data curation, and project administration. H.Z. and S.P. worked on visualization. S.N., A.P., J.L., QV.H., D.S., P.V., G.P., and N.P. provided software and resources. A.M., C.A., G.K., and C.S.T. were involved in funding acquisition. A.G., H.Z., S.N., A.P., S.P. and E.P. wrote the original draft, and A.G., H.Z., E.P., S.P., N.A., A.A., T.D., E.K., P.K., J.B.K., V.P., C.P., QV.H., G.K., T.M., E.S., C.S.T., and C.A. provided reviews and editing to the original draft. All authors read and approved the final manuscript.

### Acknowledgements

The authors would like to thank Dr. Pantelis Topalis IMBB/FORTH for fruitful discussions on HPC strategic design. We would also like to thank the ELIXIR-GR Compute platform and the Resource Allocation Committee for advice and ideas exchange.

We would also like to thank Dr. Ioulia Santi, Dr. Anastasios Bounas and Romanos Siaperas for their feedback on the systematic

labelling of the published studies used for this review.

### References

1. US Department of Commerce NOAA, How much water is in the ocean?; 2021. <https://oceanservice.noaa.gov/facts/oceanwater.html>.
2. Falkowski PG, Fenchel T, Delong EF. The microbial engines that drive Earth's biogeochemical cycles. *science* 2008;320(5879):1034–1039.
3. Estes JA, Heithaus M, McCauley DJ, Rasher DB, Worm B. Megafaunal impacts on structure and function of ocean ecosystems. *Annual Review of Environment and Resources* 2016;41:83–116.
4. Arrigo KR. Marine microorganisms and global nutrient cycles. *Nature* 2005;437(7057):349–355.
5. Boero F, Bonsdorff E. A conceptual framework for marine biodiversity and ecosystem functioning. *Marine Ecology* 2007;28:134–145.
6. Beal LM, De Ruijter WP, Biastoch A, Zahn R. On the role of the Agulhas system in ocean circulation and climate. *Nature* 2011;472(7344):429–436.
7. Remoundou K, Koundouri P, Kontogianni A, Nunes PA, Skourtos M. Valuation of natural marine ecosystems: an economic perspective. *environmental science & policy* 2009;12(7):1040–1051.
8. Bindoff NL, Cheung WWL, Kairo JG, Aristegui J, Guinder VA, Hallberg R, et al. Changing Ocean, Marine Ecosystems, and Dependent Communities. In: IPCC Special Report on the Ocean and Cryosphere in a Changing Climate; 2019.[https://www.ipcc.ch/site/assets/uploads/sites/3/2019/11/09\\_SROCC\\_Ch05\\_FINAL.pdf](https://www.ipcc.ch/site/assets/uploads/sites/3/2019/11/09_SROCC_Ch05_FINAL.pdf).
9. Sala E, Knowlton N. Global marine biodiversity trends. *Annu Rev Environ Resour* 2006;31:93–122.
10. Tonon T, Eveillard D. Marine systems biology. *Frontiers in genetics* 2015;6:181.
11. Dionisi HM, Lozada M, Olivera NL. Bioprospection of marine microorganisms: biotechnological applications and methods. *Revista Argentina De Microbiologia* 2012 Mar;44(1):49–60.
12. Tidwell JH, Allan GL. Fish as food: aquaculture's contribution. *EMBO reports* 2001;2(11):958–963.
13. Carvalho G, Hauser L. Molecular genetics and the stock concept in fisheries. In: *Molecular genetics in fisheries* Springer; 1995.p. 55–79.
14. Sakai AK, Allendorf FW, Holt JS, Lodge DM, Molofsky J, With KA, et al. The population biology of invasive species. *Annual review of ecology and systematics* 2001;32(1):305–332.
15. Begg GA, Waldman JR. An holistic approach to fish stock identification. *Fisheries research* 1999;43(1–3):35–44.
16. Loreau M. Biodiversity and ecosystem functioning: recent theoretical advances. *Oikos* 2000;91(1):3–17.
17. Leal MC, Puga J, Serôdio J, Gomes NC, Calado R. Trends in the discovery of new marine natural products from invertebrates over the last two decades—where and what are we bioprospecting? *PLoS One* 2012;7(1):e30580.
18. Norberg J, Swaney DP, Dushoff J, Lin J, Casagrandi R, Levin SA. Phenotypic diversity and ecosystem functioning in changing environments: a theoretical framework. *Proceedings of the National Academy of Sciences* 2001;98(20):11376–11381.
19. Mardis ER. Next-generation DNA sequencing methods. *Annu Rev Genomics Hum Genet* 2008;9:387–402.
20. Kulski JK. Next-generation sequencing—an overview of the history, tools, and “omic” applications. *Next generation sequencing—advances, applications and challenges* 2016;p. 3–60.
21. Goodwin S, McPherson JD, McCombie WR. Coming of age: ten years of next-generation sequencing technologies. *Nature*

- Reviews Genetics 2016;17(6):333.
22. Bundy JG, Davey MP, Viant MR. Environmental metabolomics: a critical review and future perspectives. *Metabolomics* 2009;5(1):3–21.
  23. Cahais V, Gayral P, Tsagkogeorga G, Melo-Ferreira J, Bal-lenghien M, Weinert L, et al. Reference-free transcriptome as-sembly in non-model animals from next-generation sequenc-ing data. *Molecular ecology resources* 2012;12(5):834–845.
  24. Baird NA, Etter PD, Atwood TS, Currey MC, Shiver AL, Lewis ZA, et al. Rapid SNP discovery and genetic mapping using sequenced RAD markers. *PLoS one* 2008;3(10):e3376.
  25. Tarazona S, García-Alcalde F, Dopazo J, Ferrer A, Conesa A. Differential expression in RNA-seq: a matter of depth. *Genome research* 2011;21(12):2213–2223.
  26. Goldford JE, Lu N, Bajić D, Estrela S, Tikhonov M, Sanchez-Gorostiaga A, et al. Emergent simplicity in microbial commu-nity assembly. *Science* 2018;361(6401):469–474.
  27. Merelli I, Pérez-Sánchez H, Gesing S, D'Agostino D. Managing, analysing, and integrating big data in medical bioinformat-ics: open problems and future perspectives. *BioMed research international* 2014;2014.
  28. Sohn JI, Nam JW. The present and future of de novo whole-genome assembly. *Briefings in Bioinformatics* 2018 Jan;19(1):23–40.
  29. Greene CS, Tan J, Ung M, Moore JH, Cheng C. Big data bioinfor-matics. *Journal of cellular physiology* 2014;229(12):1896–1900.
  30. Pal S, Mondal S, Das G, Khatua S, Ghosh Z. Big data in biol-ogy: The hope and present-day challenges in it. *Gene Re-ports* 2020 Dec;21:100869. <http://www.sciencedirect.com/science/article/pii/S2452014420302831>.
  31. Lampa S, Dahlö M, Olason PI, Hagberg J, Spjuth O. Lessons learned from implementing a national infrastructure in Swe-den for storage and analysis of next-generation sequencing data. *Gigascience* 2013;2(1):2047–217X.
  32. Sterling T, Brodowicz M, Anderson M. High performance com-puting: modern systems and practices. Morgan Kaufmann; 2017.
  33. Wikipedia C, Supercomputing in Europe; 2021. [Online; ac-cessed 2-April-2021]. [https://en.wikipedia.org/w/index.php?title=Supercomputing\\_in\\_Europe&oldid=1009652575](https://en.wikipedia.org/w/index.php?title=Supercomputing_in_Europe&oldid=1009652575).
  34. The Members of the PRACE Scientific Steering Committee. The scientific case for computing in Europe 2018 – 2026. ISBN: 9789082169492: Insight Publishers, Bristol, UK; 2018. <https://prace-ri.eu/about/scientific-case/>.
  35. Candela L, Castelli D, Pagano P. Virtual research environments: an overview and a research agenda. *Data Science Journal* 2013;p. GRDI–013.
  36. Haasjes GW, Containerization of legacy applications; 2021. <https://developer.ibm.com/technologies/containers/articles/containerization-of-legacy-applications/>.
  37. Rad BB, Bhatti HJ, Ahmadi M. An introduction to docker and analysis of its performance. *International Journal of Computer Science and Network Security (IJCSNS)* 2017;17(3):228.
  38. Kurtzer GM, Sochat V, Bauer MW. Singularity: Sci-entific containers for mobility of compute. *PLOS ONE* 2017;12(5):e0177459. <https://journals.plos.org/plosone/article?id=10.1371/journal.pone.0177459>.
  39. Lagnel J, Manousaki T, Kotoulas G, Magoulas A. Biocluster: an NGS-dedicated HPC cluster in IMBBC, HCMR Upcoming Up-grade Usage/Partners Training. In: 9. Hellenic Bioinformatics 2016; 2016. .
  40. Zafeiropoulos H, Gioti A, Ninidakis S, Potirakis A, Paragkamian S, Angelova N, et al. The IMBBC HPC facility: history and configuration, usage statistics, user management and task coordination data and related activities. Zenodo publication, preprint 2021;<https://doi.org/10.5281/zenodo.4665308>.
  41. Dongarra JJ, Luszczek P, Petitet A. The LINPACK Bench-mark: past, present and future. *Concurrency and Compu-tation: Practice and Experience* 2003;15(9):803–820. <https://onlinelibrary.wiley.com/doi/abs/10.1002/cpe.728>, eprint: <https://onlinelibrary.wiley.com/doi/pdf/10.1002/cpe.728>.
  42. Castrignanò T, Gioiosa S, Flati T, Cestari M, Picardi E, Chiara M, et al. ELIXIR-IT HPC@CINECA: high performance comput-ing resources for the bioinformatics community. *BMC Bioin-formatics* 2020 Aug;21(10):352. <https://doi.org/10.1186/s12859-020-03565-8>.
  43. Zafeiropoulos H, Viet HQ, Vasileiadou K, Potirakis A, Arvan-itidis C, Topalis P, et al. PEMA: a flexible Pipeline for Envi-ronmental DNA Metabarcoding Analysis of the 16S/18S ribo-somal RNA, ITS, and COI marker genes. *GigaScience* 2020 Mar;9(3):giaa022. <https://academic.oup.com/gigascience/article/doi/10.1093/gigascience/giaa022/5803335>.
  44. Catchen J, Hohenlohe PA, Bassham S, Amores A, Cresko WA. Stacks: an analysis tool set for population genomics. *Molecular Ecology* 2013 Jun;22(11):3124–3140.
  45. Varsos C, Patkos T, Oulas A, Pavloudi C, Gougousis A, Ijaz U, et al. Optimized R functions for analysis of ecological com-munity data using the R virtual laboratory (RvLab). *Biodiver-sity Data Journal* 2016 Jan;4:e8357. <https://bdj.pensoft.net/article/8357/>.
  46. Katsanevakis S, Coll M, Piroddi C, Steenbeek J, Ben Rais Lasram F, Zenetos A, et al. Invading the Mediterranean Sea: biodiver-sity patterns shaped by human activities. *Frontiers in Ma-rine Science* 2014;1. <https://www.frontiersin.org/articles/10.3389/fmars.2014.00032/full>, publisher: Frontiers.
  47. Klymus KE, Marshall NT, Stepien CA. Environmen-tal DNA (eDNA) metabarcoding assays to detect invasive invertebrate species in the Great Lakes. *PLOS ONE* 2017;12(5):e0177643. <https://journals.plos.org/plosone/article?id=10.1371/journal.pone.0177643>, publisher: Public Library of Science.
  48. Bariche M, Al-Mabruk SaA, Ateş MA, Büyük A, Crocetta F, Dritsas M, et al. New Alien Mediterranean Biodiversity Records (March 2020). *Mediterranean Marine Science* 2020 Apr;21(1):129–145. <https://ejournals.epublishing.ekt.gr/index.php/hcmr-med-mar-sc/article/view/21987>, number: 1.
  49. Obst M, Exter K, Allcock AL, Arvanitidis C, Axberg A, Bus-tamante M, et al. A Marine Biodiversity Observation Net-work for Genetic Monitoring of Hard-Bottom Communi-ties (ARMS-MBON). *Frontiers in Marine Science* 2020 Nov;7:572680. <https://www.frontiersin.org/articles/10.3389/fmars.2020.572680/full>.
  50. Pauletto M, Manousaki T, Ferraresso S, Babbucci M, Tsako-giannis A, Louro B, et al. Genomic analysis of Sparus au-rata reveals the evolutionary dynamics of sex-biased genes in a sequential hermaphrodite fish. *Communications Biol-ogy* 2018 Aug;1(1):1–13. <https://www.nature.com/articles/s42003-018-0122-7>.
  51. Sarropoulou E, Sundaram AYM, Kaitetidou E, Kotoulas G, Gil-fillan GD, Papandroulakis N, et al. Full genome survey and dynamics of gene expression in the greater amberjack *Seriola dumerili*. *GigaScience* 2017 Dec;6(12). <https://academic.oup.com/gigascience/article/6/12/gix108/4600083>.
  52. Tsakogiannis A, Manousaki T, Anagnostopoulou V, Stavroulaki M, Apostolaki ET. The Importance of Genomics for Deciphering the Invasion Success of the Seagrass *Halophila stipulacea* in the Changing Mediterranean Sea. *Diversity* 2020;12(7). <https://www.mdpi.com/1424-2818/12/7/263>.
  53. Danis T, Tsakogiannis A, Kristoffersen JB, Golani D, Tsaparis D, Kasapidis P, et al. Building a high-quality reference genome assembly for the eastern Mediterranean Sea invasive sprinter *Lagocephalus scleratus* (Tetraodontiformes, Tetraodontidae). *bioRxiv* 2020 Feb;p. 2020.02.17.952580. <https://www.biorxiv.org/content/10.1101/2020.02.17.952580v2>.
  54. Angelova N, Danis T, Jacques L, Tsigenopoulos C, Manousaki T, SnakeCube: containerized and automated next- generation

- sequencing (NGS) pipelines for genome analyses in HPC environments. Zenodo; 2021. <https://doi.org/10.5281/zenodo.4663113>.
55. Natsidis P, Tsakogiannis A, Pavlidis P, Tsigenopoulos CS, Manousaki T. Phylogenomics investigation of sparids (Teleostei: Spariformes) using high-quality proteomes highlights the importance of taxon sampling. *Communications Biology* 2019 Nov;2(1):1–10. <https://www.nature.com/articles/s42003-019-0654-5>, number: 1 Publisher: Nature Publishing Group.
  56. Sarropoulou E, Sepulcre P, Poisa-Beiro L, Mulero V, Meseguer J, Figueras A, et al. Profiling of infection specific mRNA transcripts of the European seabass *Dicentrarchus labrax*. *BMC Genomics* 2009 Apr;10(1):157. <https://doi.org/10.1186/1471-2164-10-157>.
  57. Papadaki M, Kaitetzidou E, Mylonas CC, Sarropoulou E. Non-coding RNA Expression Patterns of Two Different Teleost Gonad Maturation Stages. *Marine Biotechnology* 2020;22(5):683–695.
  58. Warwick RM, Somerfield PJ. All animals are equal, but some animals are more equal than others. *Journal of Experimental Marine Biology and Ecology* 2008 Nov;366(1):184–186. <http://www.sciencedirect.com/science/article/pii/S0022098108003444>.
  59. Arvanitidis CD, Warwick RM, Somerfield PJ, Pavloudi C, Pafilis E, Oulas A, et al. Research Infrastructures offer capacity to address scientific questions never attempted before: Are all taxa equal? PeerJ Inc.; 2018.
  60. Vandepitte L, Vanhoorne B, Decock W, Vranken S, Lanssens T, Dekeyser S, et al. A decade of the World Register of Marine Species – General insights and experiences from the Data Management Team: Where are we, what have we learned and how can we continue? *PLOS ONE* 2018;13(4):e0194599. <https://journals.plos.org/plosone/article?id=10.1371/journal.pone.0194599>, publisher: Public Library of Science.
  61. Gioti A, Siaperas R, Nikolaivits E, Goff GL, Ouazzani J, Kotoulas G, et al. Draft Genome Sequence of a *Cladosporium* Species Isolated from the Mesophotic Ascidian *Didemnum maculosum*. *Microbiology Resource Announcements* 2020 Apr;9(18). <https://mra.asm.org/content/9/18/e00311-20>, publisher: American Society for Microbiology Section: Genome Sequences.
  62. Nikolaivits E, Siaperas R, Agrafiotis A, Ouazzani J, Magoulas A, Gioti A, et al. Functional and transcriptomic investigation of laccase activity in the presence of PCB29 identifies two novel enzymes and the multicopper oxidase repertoire of a marine-derived fungus. *Science of The Total Environment* 2021 Jun;775:145818. <https://www.sciencedirect.com/science/article/pii/S0048969721008858>.
  63. Dagum L, Menon R. OpenMP: an industry standard API for shared-memory programming. *IEEE Computational Science and Engineering* 1998 Jan;5(1):46–55. Conference Name: IEEE Computational Science and Engineering.
  64. Vouzis PD, Sahinidis NV. GPU-BLAST: using graphics processors to accelerate protein sequence alignment. *Bioinformatics* 2011 Jan;27(2):182–188. <https://doi.org/10.1093/bioinformatics/btq644>.
  65. Nobile MS, Cazzaniga P, Tangherloni A, Besozzi D. Graphics processing units in bioinformatics, computational biology and systems biology. *Briefings in Bioinformatics* 2017 Sep;18(5):870–885. <https://doi.org/10.1093/bib/bbw058>.
  66. Dahlö M, Scofield DG, Schaal W, Spjuth O. Tracking the NGS revolution: managing life science research on shared high-performance computing clusters. *GigaScience* 2018 May;7(giy028). <https://doi.org/10.1093/gigascience/gyi028>.

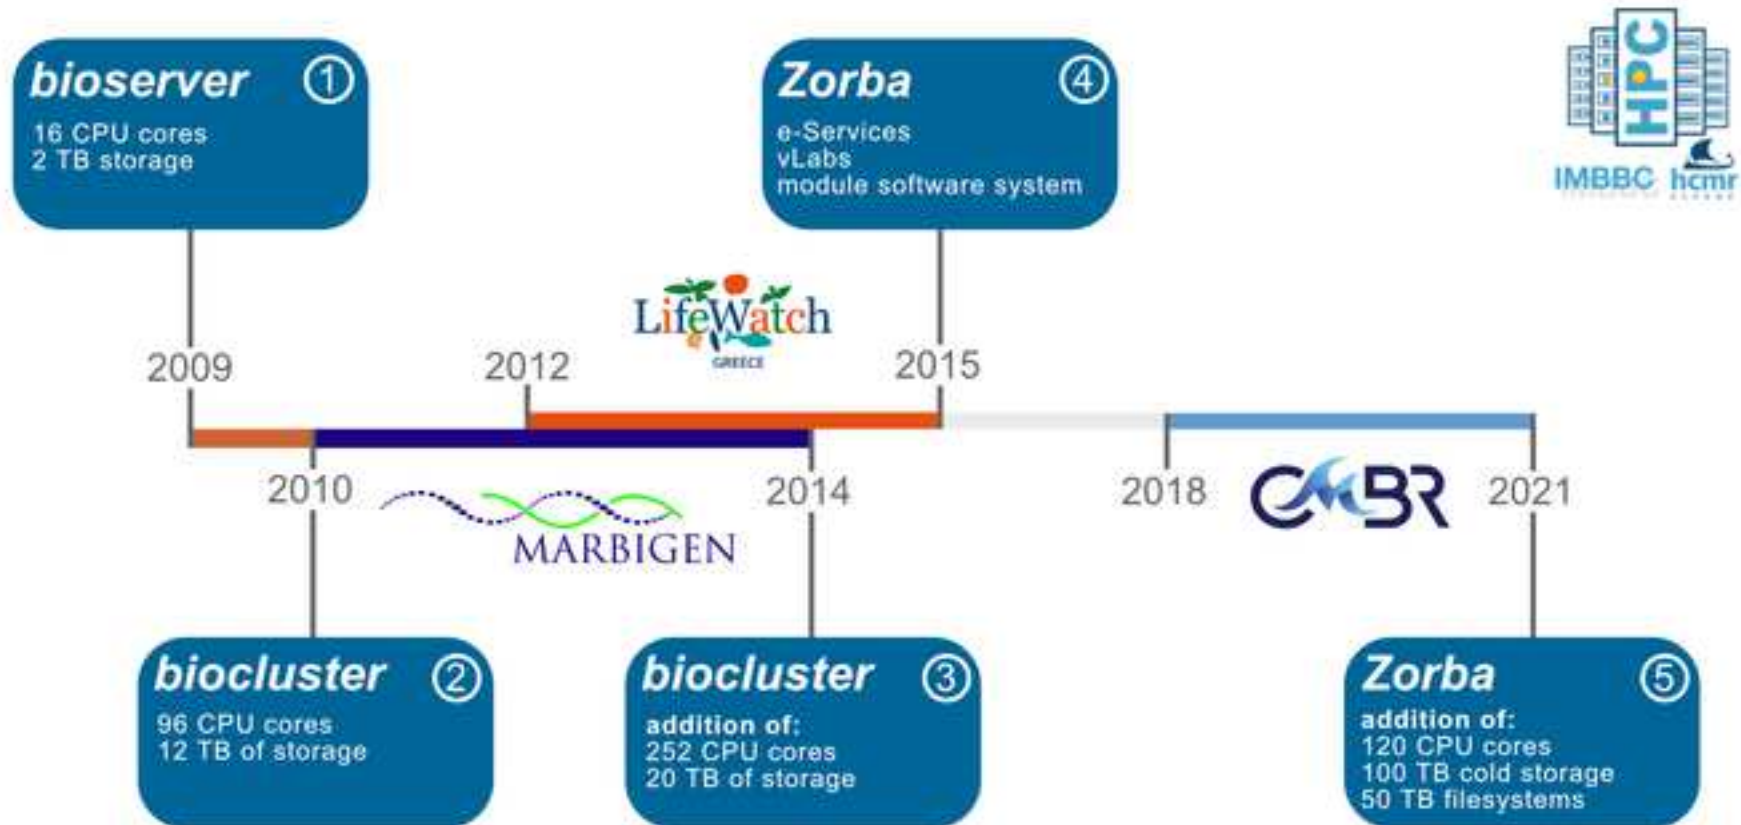

Figure2: zorba configuration

[Click here to access/download;Figure;zorba\\_architecture.png](#)

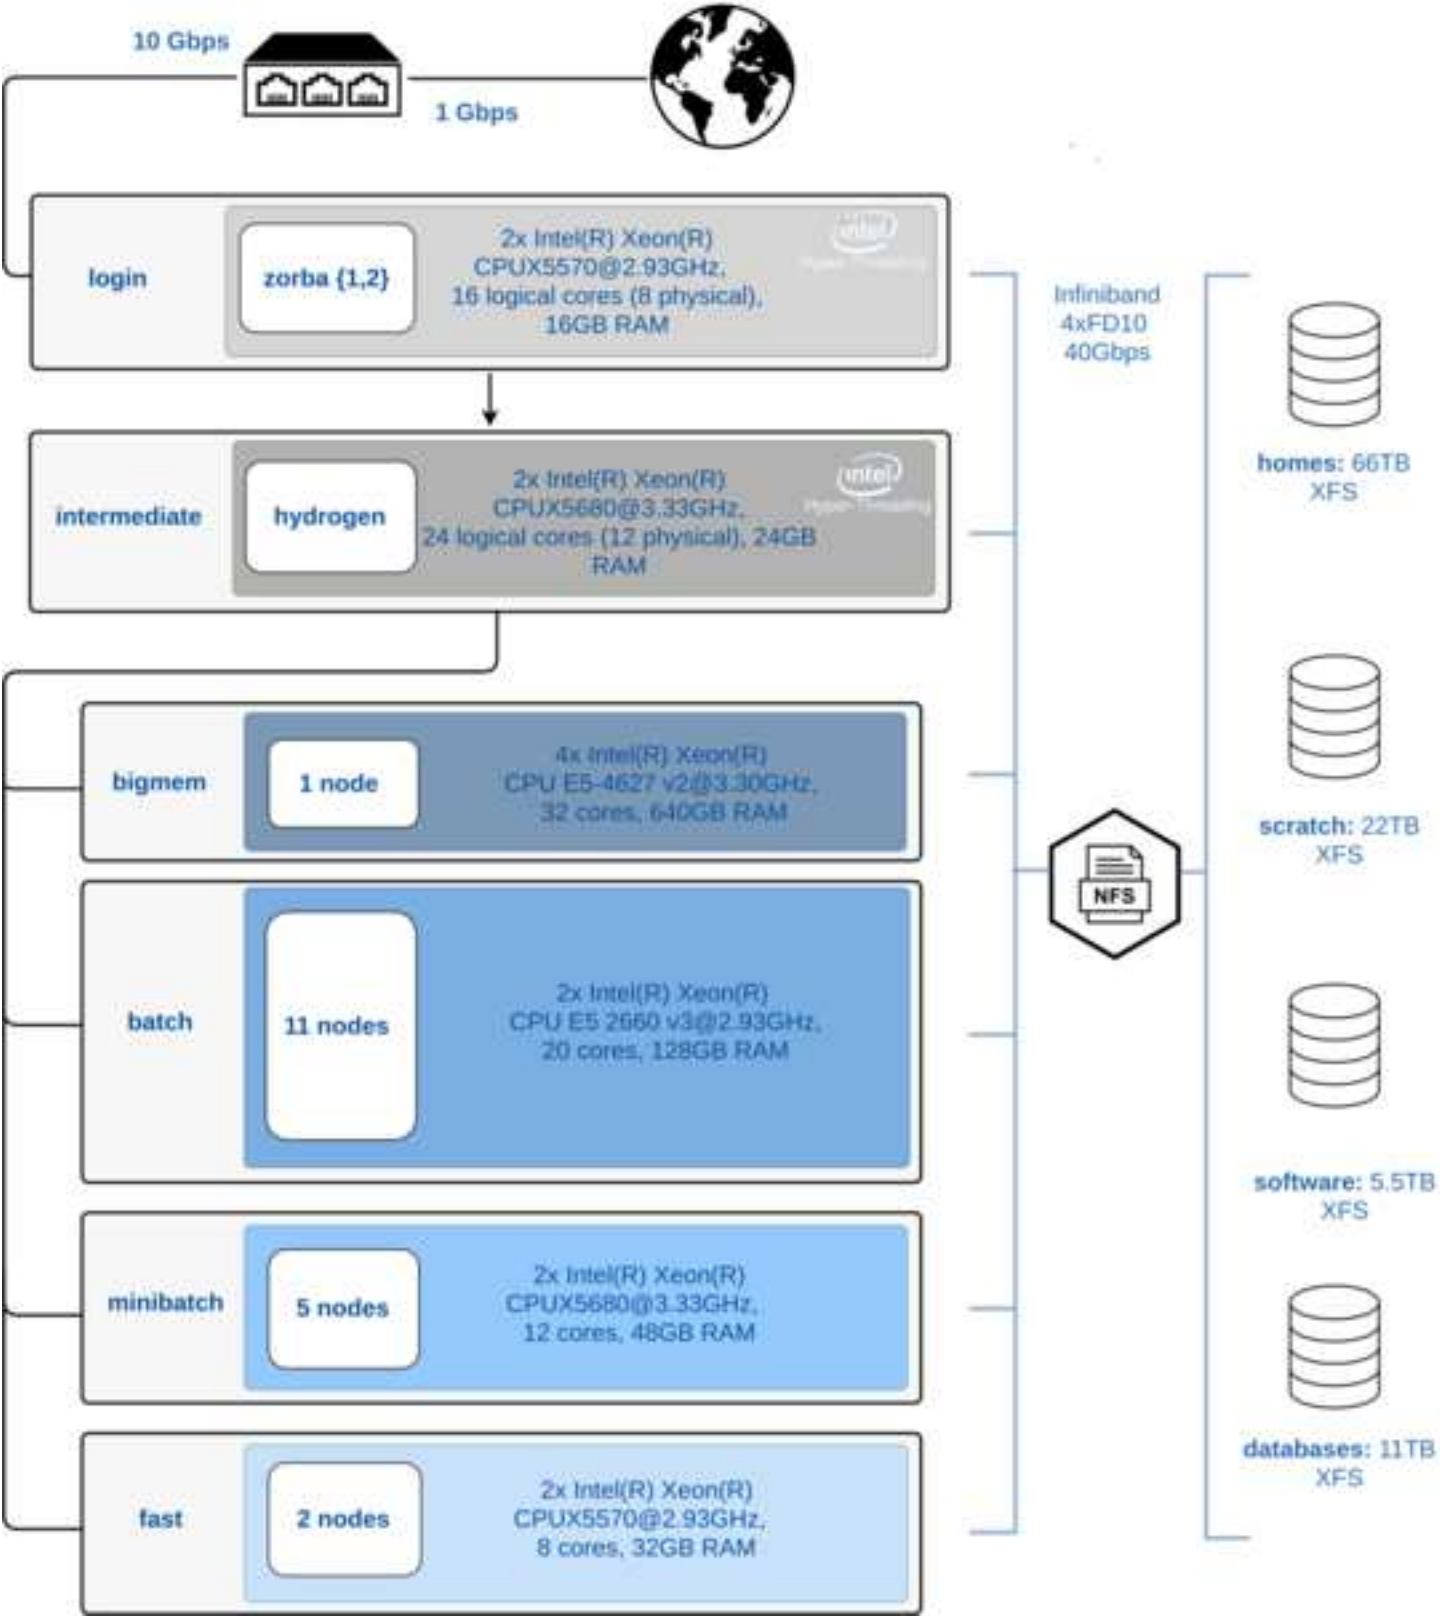

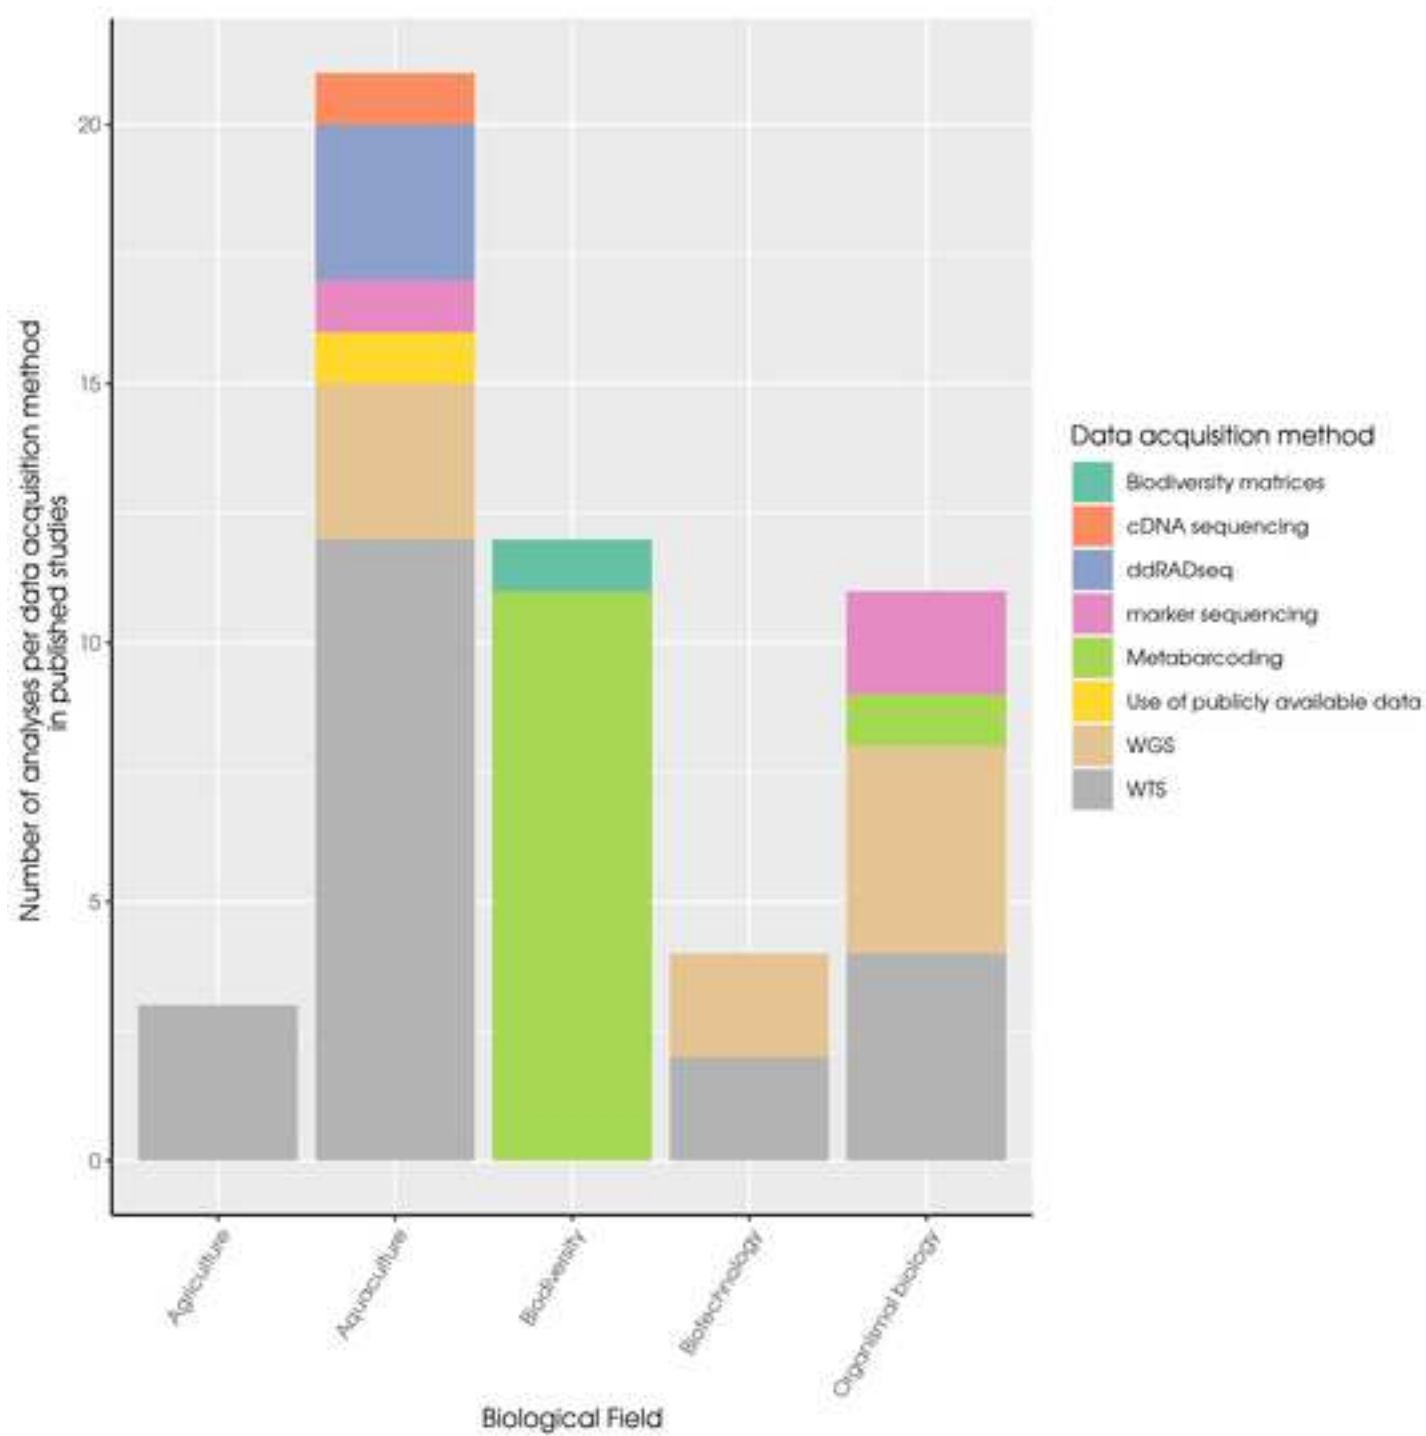

Figure4: computational requirements

[Click here to access/download;Figure;computational\\_method\\_computational\\_requirement\\_plot.png](#)

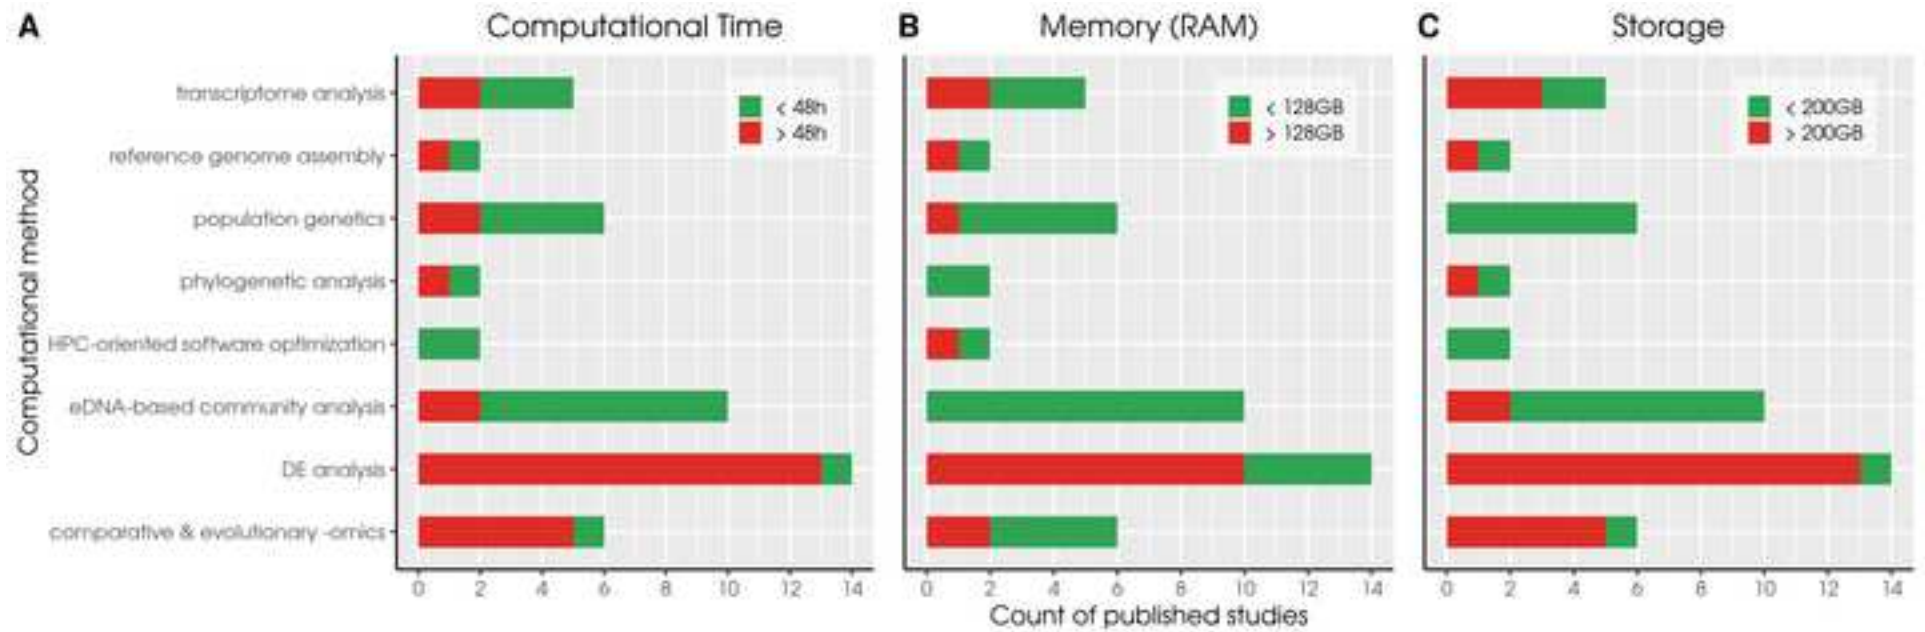

Supplement: giab053_GIGA-D-21-00111_Original_Submission [file giab053_giga-d-21-00111_original_submission.pdf]
